# Supplementary material for: Musa paradisiaca inflorescence induces human colon cancer cell death by modulating cascades of transcriptional events
Source: Royal Society of Chemistry journal article supplement (doi:10.1039/c7fo01454f), 2017-11-29
Supplement: c7fo01454f1.pdf [file c7fo01454f1.pdf]

## 1 Supplementary Figures

2

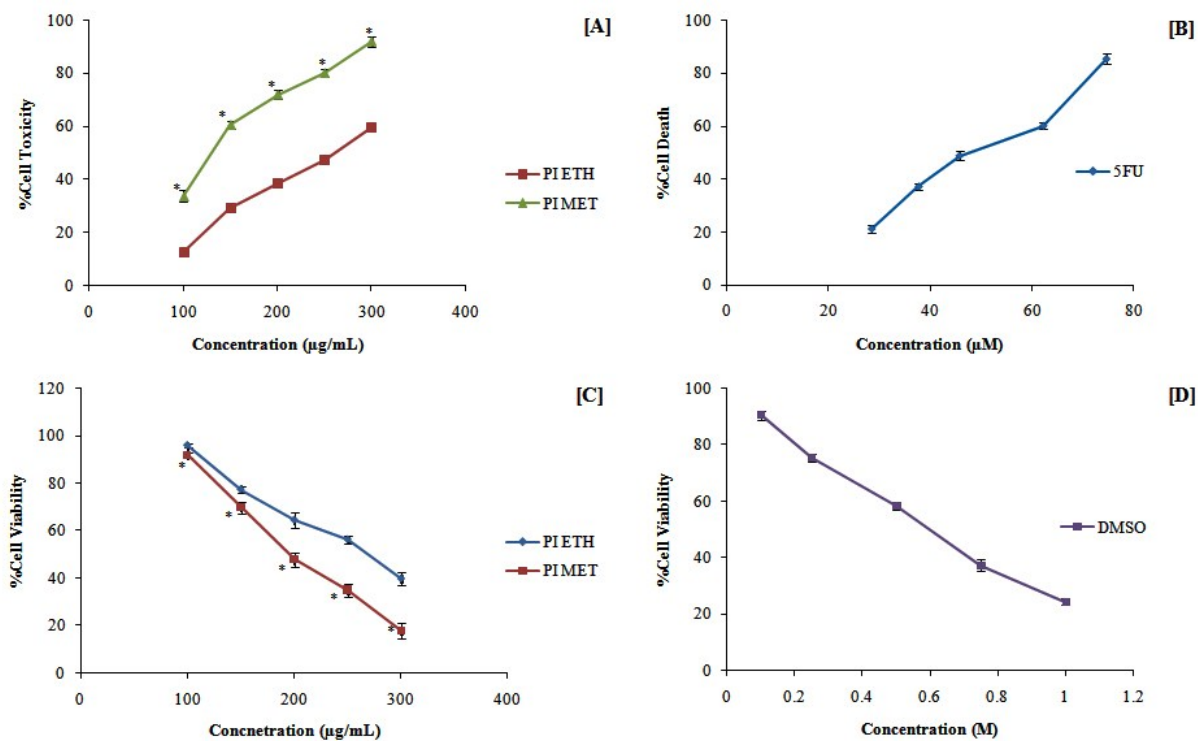

3

4 **Supplementary Figure S1.** Cytotoxic effect determined by MTT and LDH release assays  
5 against HT29 colon cancer cells. [A & B] Cytotoxic effect of PI extracts and 5-fluorouracil  
6 determined by MTT assay. [C & D] Cytotoxic effect of PI extracts and DMSO determined by  
7 LDH assay. Each value represents mean  $\pm$  SD from triplicate measurements.  $p \leq 0.05$  considered  
8 as significant. \*Methanol extract (PIMET) significantly different from ethyl acetate  
9 extract (PIETH).

10

11

12

13

14

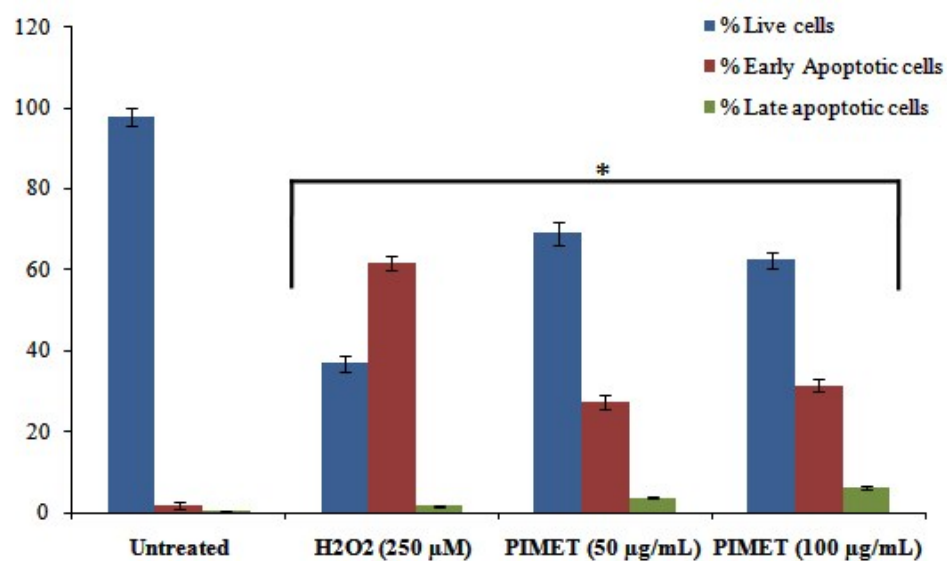

**Supplementary Figure S2.** Quantification of the live, early apoptotic, and late apoptotic cells. Tests were done in triplicate, counting a minimum of 200 total cells each in three different fields. \*significantly different from untreated control.

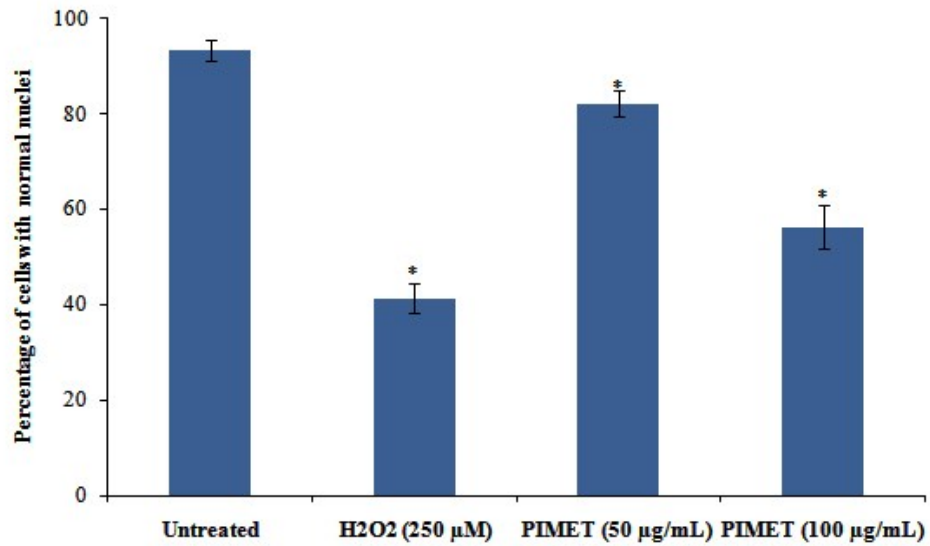

**Supplementary Figure S3.** Quantification of the cells with normal nuclei. Tests were done in triplicate, counting a minimum of 200 total cells each in three different fields. \*significantly different from untreated control.

50

## 51 **Method**

### 52 *Detection of cell death by acridine orange/ethidium bromide staining*

53 The effect of PI extract to induce cell death in HT29 cells was determined by AO/EtBr dual  
54 staining (Pitchai et al. 2014). The cells were grown on the 96 well black plate, and then treated  
55 with the different concentration of PIMET for 24 h. After incubation, 5  $\mu$ L of AO (1 mg/mL) and  
56 5  $\mu$ L of EtBr (1 mg/mL) were added, and the induction of cell death was observed by using  
57 confocal microscopy (BD Pathway 855, BD Bioscience, USA). The percentages of viable, early  
58 apoptotic, late apoptotic and secondary necrotic cells were determined by counting 200 cells in  
59 three different fields in triplicate.

### 60 *Hoechst 33342 staining*

61 Apoptotic activity of extract on HT29 cells were determined by Hoechst 33342 staining as  
62 described by Harada et al. (2005) with slight modification.  $1 \times 10^4$  cells were treated with  
63 different volumes of PI extract and incubated for 24 h. Control group cells treated with media  
64 containing 0.1% DMSO and  $H_2O_2$  (250  $\mu$ M) was used as positive control. Cells were washed  
65 with PBS and fixed with 70% ethanol for 5 min. After fixation, cells were incubated with  
66 Hoechst 33258 stain in PBS (5  $\mu$ g/mL) for 30 min at 37°C in the dark. Cells were thoroughly  
67 washed with PBS and examined under confocal microscope (BD Pathway 855, BD Bioscience,  
68 USA) with an excitation of 350 nm and emission of 460 nm. Apoptotic cells were identified by  
69 nuclear condensation and apoptotic bodies. The percentage of cells with normal nuclei was  
70 determined by counting 200 cells in three different fields in triplicate.

### 71 *Detection of mitochondrial membrane potential in HT29 cells*

72 The effect of PI extracts on mitochondrial membrane potential was identified by staining with  
73 Rh123, a green fluorescent cationic dye that binds to polarized mitochondrial membrane and  
74 accumulates as aggregates in the mitochondria of normal cells. When there is reduction in  
75 mitochondrial membrane potential, the dye washes out resulting in reduction of green  
76 fluorescence. For analysis of changes in mitochondrial trans-membrane potential, HT29 cells  
77 were treated with the different concentrations of PI extract for 24 h. Following the treatment, the  
78 cells were directly incubated with Rh123 (1.6 mM) for 20 min in the dark, followed by rinsing  
79 with several changes of PBS. Data analysis was performed using FACS. A reduction in Rh123  
80 green fluorescence indicates reduced mitochondrial membrane potential.

#### 81 *Adenisonone triphosphate (ATP) production by HPLC analysis*

82 The ATP levels in HT29 cells after treatment with extract was determined using HPLC method  
83 (Hahn-Windgassen et al., 2005). After treatment, the cells were trypsinized and centrifuged at  
84 800×g for 3 min and the pellets were suspended in 4% perchloric acid on ice for 30 min. The pH  
85 of the lysates was adjusted between 6 and 8 with 2 M KOH. Precipitated salt was separated from  
86 the liquid phase by centrifugation at 13000×g for 10 min at 4°C. ATP was quantified on a  
87 Prominence HPLC system (Shimadzu, Japan) containing LC-20 AD system controller,  
88 Phenomenex Gemini C18 column (250×4.6 mm, 5 µm), a column oven (CTO-20A), a Rheodyne  
89 injector (USA) with a loop of 20 µL volume and a diode array detector (SPD-M20A). A buffer  
90 20 mM KH<sub>2</sub>PO<sub>4</sub> and 3.5 mM K<sub>2</sub>HPO<sub>4</sub> 3H<sub>2</sub>O (pH 6.1) was used as the mobile phase. The flow  
91 rate was 1 mL/min, the injection volume was 20 µL and column was at 37°C. The fractions were  
92 monitored at 259 nm. Sample peaks were identified by comparing with retention times of  
93 standard peaks and by spiking with standards. LC Lab Solutions software was used for data  
94 acquisition and analysis.

## 95 *Detection of Cytochrome C release*

96 Cytochrome C release due to mitochondrial damage was assessed according to Radhakrishnan et  
97 al. (2007) with slight modifications. After the treatment of HT29 cells with PI extract, cells were  
98 trypsinized and suspended in 50% acetonitrile solution containing 0.1% trifluoro acetic acid  
99 (TFA) and kept at room temperature for 10 min with mild intermediate mixing. Then the mixture  
100 was centrifuged at 5000 rpm for 10 min to precipitate high molecular weight plasma proteins.  
101 Cytochrome C content in the supernatant was quantified on a Prominence HPLC system  
102 (Shimadzu, Japan) containing LC-20 AD system controller, Phenomenex Gemini C18 column  
103 (250×4.6 mm, 5 µm), a column oven (CTO-20A), a Rheodyne injector (USA) with a loop of 20  
104 µL volume and a diode array detector (SPD-M20A). A gradient system consisting of solvent A-  
105 0.1% TFA in water: 0.1% TFA in acetonitrile (70:30) and solvent B - 0.1% TFA in water: 0.1%  
106 TFA in acetonitrile (64:36) was used as mobile phase achieving gradient range 0-100% B in 30  
107 min. The flow rate was 1 mL/min, the injection volume was 20 µL and column was at 37°C. The  
108 fractions were monitored at 393 nm. Sample peaks were identified by comparing with retention  
109 time of standard peak. LC Lab Solutions software was used for data acquisition and analysis.

110

111

112

113

114

115

116

117
